# Supplementary material for: Disturbances of the Gut Microbiota, Sleep Architecture, and mTOR Signaling Pathway in Patients with Severe Obstructive Sleep Apnea-Associated Hypertension
Source: Hindawi journal article supplement (doi:10.1155/2021/9877053), 2021-11-30

Supplementary Figure 1S

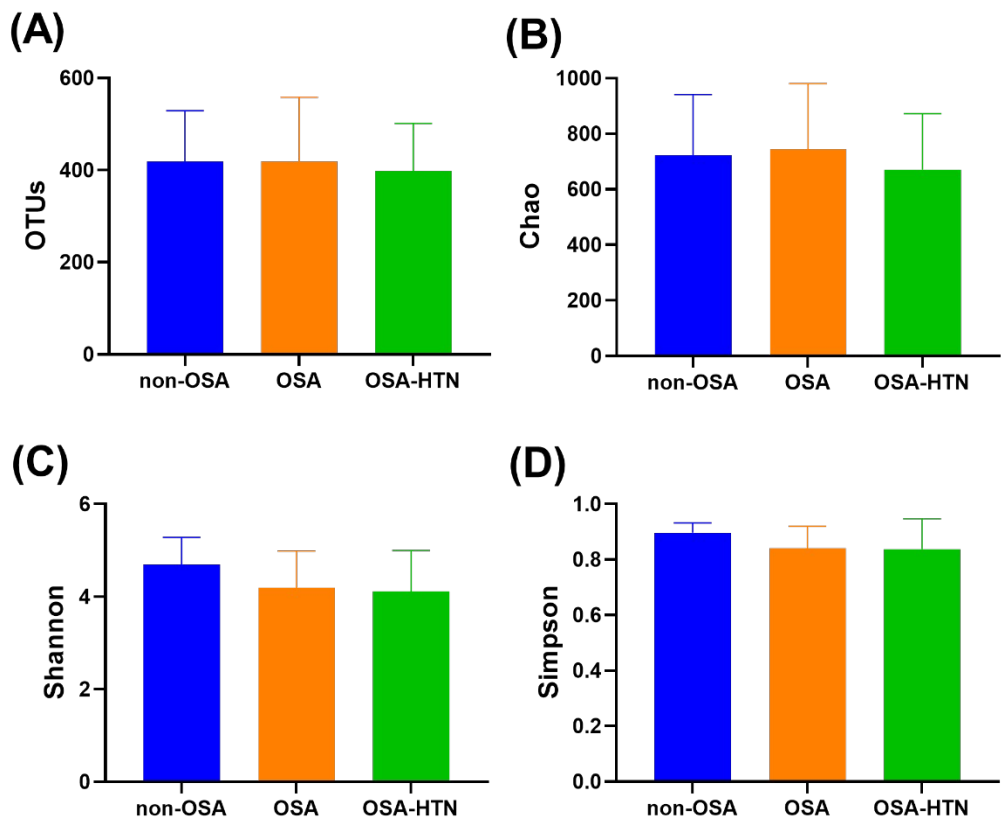

Supplement: f1 [file 9877053.f1.pdf]
